# Supplementary material
Source: publisher site journal article supplement (https://www.dovepress.com/get_supplementary_file.php?f=266960.docx)
Supplement: Supplementary file 1 [file get_supplementary_file.php]

**Appendix: Interview guide**

A new interview guide was prepared every year when the student interviews were conducted. Throughout the six years, the relationship between theory and practice was a key topic in our investigation.

Example questions:

- Describe a particularly good experience this academic year related to a) teaching on campus, b) teaching in practice. Justify why.

Then describe a similar bad experience. Justify why.

- How would you describe a good teaching situation that is also perceived as a good learning situation?
- Which teaching situations do you find particularly motivating and inspiring (for your own learning)? Justify why.
- How would you describe a clever medical educator?
- Describe your thoughts and experiences regarding the mentor’s activities related to conversation, discussion, reflection, experiences, and critical thinking.

Follow-up questions were used for clarification and to encourage further in-depth answers.
